# Supplementary material for: Enhanced immunogenicity induced by mRNA vaccines with various lipid nanoparticles as carriers for SARS-CoV-2 infection
Source: Royal Society of Chemistry journal article supplement (doi:10.1039/d3tb00303e), 2023-01-01
Supplement: d3tb00303e1.pdf [file d3tb00303e1.pdf]

## Supporting Information

### **Enhanced immunogenicity induced by mRNA vaccines with various lipid nanoparticles as carriers for SARS-CoV-2 infection**

5 Yanhao Zhang, Ji Wang, Hanlei Xing, Chao Liu, Wenhui Zha, Shuo Dong, Yuhao Jiang, and Xinsong Li\*

School of Chemistry and Chemical Engineering, Southeast University, Nanjing 211189, P. R. China

\* Correspondence author, email: [lixs@seu.edu.com](mailto:lixs@seu.edu.com) (X. Li)

10

#### Table of Contents

|    |                                                                                                                                    |    |
|----|------------------------------------------------------------------------------------------------------------------------------------|----|
|    | <b>1. Synthesis of ionizable lipids</b> .....                                                                                      | 2  |
|    | <b>1.1 Synthesis of H01</b> .....                                                                                                  | 2  |
|    | <b>1.2 Synthesis of H02</b> .....                                                                                                  | 3  |
| 15 | <b>1.3 Synthesis of H03</b> .....                                                                                                  | 4  |
|    | <b>1.4 Synthesis of H04</b> .....                                                                                                  | 5  |
|    | <b>1.5 Synthesis of H05</b> .....                                                                                                  | 6  |
|    | <b>2. Mass spectra of five ionizable lipids</b> .....                                                                              | 8  |
|    | <b>3. <sup>1</sup>H NMR spectra of five ionizable lipids</b> .....                                                                 | 10 |
| 20 | <b>4. Percentages of eGFP positive cells measured by flow cytometry</b> .....                                                      | 12 |
|    | <b>5. Images of lysosomal escape assay of H01-mRNA, H02-mRNA, H04-mRNA and H05-mRNA</b> .....                                      | 12 |
|    | <b>6. SARS-CoV-2 (B.1.617.2) RBD-specific CD4+ (a) and CD8+ (b) Tem cells in splenocytes were detected by flow cytometry</b> ..... | 13 |
| 25 | <b>7. Storage stability of H03-Fluc mRNA and MC3-Fluc mRNA formulations</b> .....                                                  | 14 |
|    | <b>8. Amino acid sequence alignment of the SARS-CoV-2(B.1.617.2) RBD</b> .....                                                     | 15 |
|    | <b>9. The peptide pools of the RBD antigen.</b> .....                                                                              | 15 |
|    | <b>10. Raw western blot data for Fig.3h</b> .....                                                                                  | 16 |

## 30 1 Synthesis of ionizable lipids

### 1.1 Synthesis of 2-hexyldecyl 6-(dodecyl(2-hydroxypropyl)amino)hexanoate (H01)

Compound H01 was synthesized by a three-step reaction as shown in scheme 1.

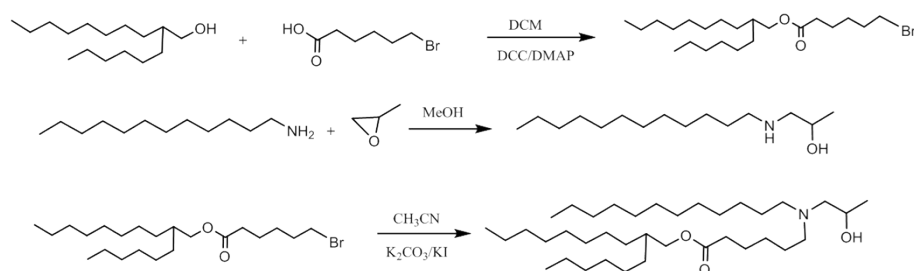

Scheme 1

### 35 1.1.1 Synthesis of 2-hexyldecyl 6-bromohexanoate

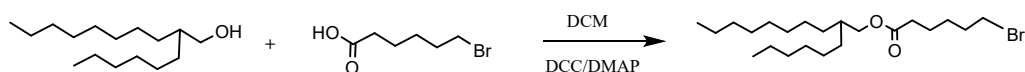

DCC (7.50 g, 36.4 mmol) was added to the dichloromethane (DCM) solution containing 6-bromohexanoic acid (5.76 g, 29.8 mmol) at 25 °C and the solution was stirred for 20 mins at room temperature. Then, 2-hexyldecyl-1-ol (6.0 g, 24.8 mmol) and DMAP (170 mg) were added in the above solution overnight at room temperature. The crude product was obtained under reduced pressure and purified by silica column chromatography (methanol/dichloromethane = 1/20) to give colorless oil. (8.5g, 20.33 mmol, 77.3% yield). <sup>1</sup>H NMR (600 MHz, CDCl<sub>3</sub>): δ 3.97 (d, J = 5.8 Hz, 2H), 3.40 (t, J = 6.8 Hz, 2H), 2.33 (t, J = 7.4 Hz, 2H), 1.92 – 1.82 (m, 2H), 1.64 (dp, J = 15.4, 6.4, 5.2 Hz, 3H), 1.48 (p, J = 7.6, 7.1 Hz, 2H), 0.88 (t, J = 6.9 Hz, 6H).

### 1.1.2 Synthesis of 1-(dodecylamino)propan-2-ol

50

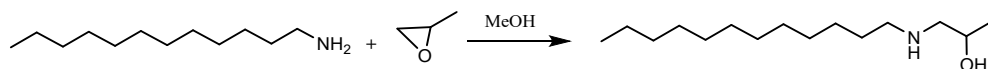

Dodecan-1-amine (5.76 g, 29.8 mmol) and 2-methyloxirane (7.50 g, 36.4 mmol) were added to methanol (100 mL) and the solution was stirred under ambient condition for 24 h. The reaction mixture was dried under decompression condition to remove the excess 2-methyloxirane. The product was obtained as colorless oil (8.5g, 20.33 mmol, 77.3% yield) and confirmed by LCMS [M + H]<sup>+</sup> 244.26, found 244.2.

### 1.1.3 Synthesis of 2-hexyldecyl 6-(dodecyl(2-hydroxypropyl)amino)hexanoate (H01)

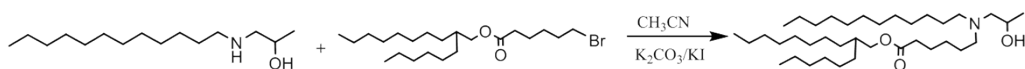

H01

60

2-Hexyldecyl 6-bromohexanoate (0.836g, 2 mmol), K<sub>2</sub>CO<sub>3</sub> (447mg, 6.0 mmol) and KI (48.6 mg, 0.6 mmol), 1-(dodecylamino)propan-2-ol (0.442 g, 1mmol) were dissolved in CNCH<sub>3</sub> (15 mL). After the mixture solution was stirred at 90 °C for 5 hours, the solution was filtered and dried under decompression condition. The obtained residues  
 65 were redissolved in dichloromethane (50 mL) and washed with brine (2 x 40 mL). The combined organic layer was concentrated to give crude product which was further purified by silica column chromatography (methanol/dichloromethane = 1/20). Compound **H01** was light yellow oil (0.32 g, 3.6 mmol, 39.0%) and confirmed by LC-TOF [M + H]<sup>+</sup> 582.57, found 582.58 and <sup>1</sup>H NMR. <sup>1</sup>H NMR (600 MHz, CDCl<sub>3</sub>) δ 3.97  
 70 (d, *J* = 5.8 Hz, 2H), 3.72 (dd, *J* = 14.0, 7.0 Hz, 1H), 2.59 – 2.24 (m, 8H), 1.97 (s, 1H), 1.43 (d, *J* = 14.5 Hz, 6H), 1.31 – 1.25 (m, 44H), 1.12 (d, *J* = 6.0 Hz, 3H), 0.88 (t, *J* = 7.0 Hz, 9H).

## 1.2 Synthesis of 2-hexyldecyl 6-(dodecyl(2-hydroxypropyl)amino)hexanoate (**H02**)

75 Compound **H02** was synthesized by a two-step reaction as shown in scheme 2.

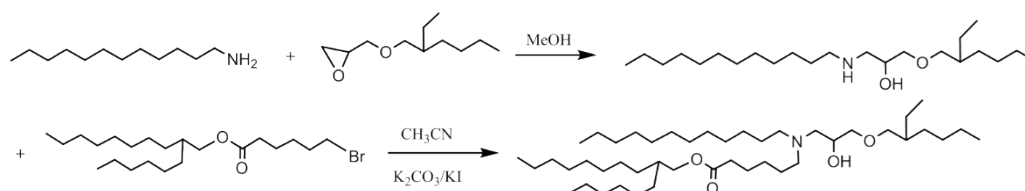

Scheme 2

### 1.2.1 Synthesis of 1-(dodecylamino)-3-(((2-ethylhexyl)oxy)propyl)propan-2-ol

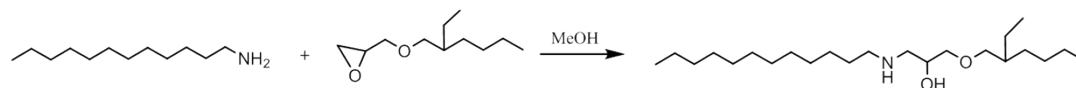

Dodecan-1-amine (5.76 g, 29.8 mmol) and 2-(((2-ethylhexyl)oxy)methyl)oxirane (7.50  
 80 g, 36.4 mmol) were added to methanol (100 mL) and the solution was stirred under ambient condition for 24 h. The reaction mixture was dried under decompression condition to remove the excess 2-methyloxirane. The crude product was further purified by silica column chromatography (methanol/dichloromethane = 1/20). The product **C1** was light yellow oil (0.32 g, 3.6 mmol, 39.0%) and confirmed by LCMS [M + H]<sup>+</sup>  
 85 372.38, found 372.2.

### 1.2.2 Synthesis of 2-hexyldecyl 6-(dodecyl(3-(((2-ethylhexyl)oxy)propyl)amino)hexanoate (**H02**)

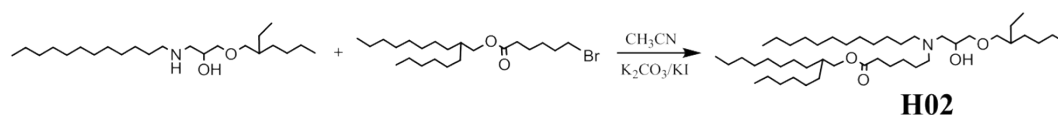

2-Hexyldecyl 6-bromohexanoate (0.836g, 2 mmol), K<sub>2</sub>CO<sub>3</sub> (447mg, 6.0 mmol) and KI (48.6 mg, 0.6 mmol), 1-(dodecylamino)propan-2-ol (0.442 g, 1mmol) were dissolved in CNCH<sub>3</sub> (15 mL). After the mixture solution was stirred at 90 °C for 5 hours, the solution was filtered and dried under decompression condition. The obtained residues  
 90 were redissolved in dichloromethane (50 mL) and washed with brine (2 x 40 mL). The

combined organic layer was concentrated to give crude product which was further  
 95 purified by silica column chromatography (methanol/dichloromethane = 1/20).  
 Compound **H02** was light yellow oil (0.32 g, 3.6 mmol, 39.0%) and confirmed by LC-  
 TOF  $[M + H]^+$  710.69, found 710.70 and  $^1\text{H NMR}$ .  $^1\text{H NMR}$  (600 MHz,  $\text{CDCl}_3$ )  $\delta$  3.97  
 (d,  $J = 5.8$  Hz, 2H), 3.74 (d,  $J = 6.9$  Hz, 1H), 3.46 – 3.27 (m, 4H), 2.71 – 2.18 (m, 7H),  
 1.60 (d,  $J = 27.2$  Hz, 14H), 1.37 – 1.12 (m, 44H), 0.95 – 0.65 (m, 15H).

100

### 1.3 Synthesis of 2-hexyldecyl 6-(ethyl(3-((2-hexyldecyl)oxy)-2-hydroxypropyl)amino)hexanoate (**H03**)

Compound **H03** was synthesized by a three-step reaction as shown in scheme 3.

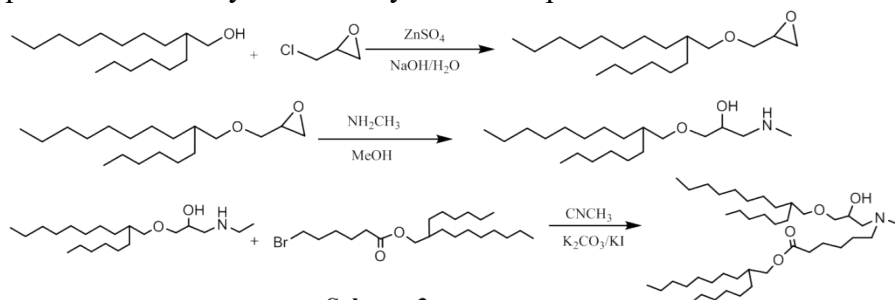

Scheme 3

#### 105 1.3.1 Synthesis of 2-(((2-hexyldecyl)oxy)methyl)oxirane

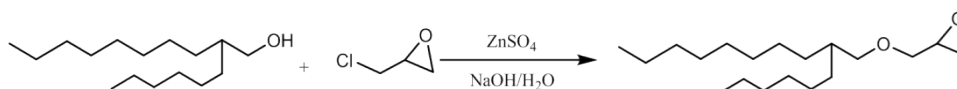

To a flask was added into 2-hexyldecyl-1-ol (2.42g, 10 mmol), Zinc chloride (80 mg)  
 110 and a catalytic amount of sulfuric acid. The mixture was added epichlorohydrin (1.84  
 g, 20 mmol) dropwise within 30 mins, followed by a reaction at 120 °C for 2 hours.  
 After the mixture solution was cooled to room temperature, the solid residues were  
 removed by filtration and the excess epichlorohydrin was removed under  
 decompression condition. Next, the above solution was mixed with sodium hydroxide  
 115 aqueous (20%) and was stirred at 40 °C for 4h. Finally, the water phase was removed  
 and the organic phase was dried under reduced pressure to give the product (1.87g, 6.2  
 mmol, 74.8% yield) which was confirmed by  $^1\text{H NMR}$  and LCMS. LCMS:  $[M + \text{Na}]^+$   
 321.29, found 321.1.  $^1\text{H NMR}$  (600 MHz,  $\text{CDCl}_3$ )  $\delta$  3.96 (p,  $J = 5.5$  Hz, 1H), 3.78 –  
 3.22 (m, 6H), 1.56 (p,  $J = 5.1, 4.0$  Hz, 1H), 0.88 (t,  $J = 6.9$  Hz, 6H).

#### 120 1.3.2 Synthesis of 1-((2-hexyldecyl)oxy)-3-(methylamino)propan-2-ol

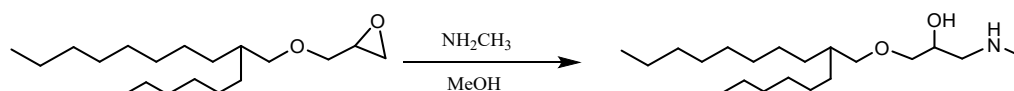

To a flask was added into Methnol (15 mL), Ethylamine (0.60 g, 13.3 mmol) and 2-  
 (((2-hexyldecyl)oxy)methyl)oxirane (1.0 g, 3.34 mmol). The mixture solution was  
 stirred overnight at room temperature. The reaction solution was concentrated and  
 125 further purified by silica column chromatography (methanol/dichloromethane=1/20).  
 The obtained product was light yellow oil (0.64 g, 12.4 mmol, 55.6%) and confirmed

by LC-TOF  $[M + H]^+$  330.33, found 330.32.

### 1.3.3 Synthesis of 2-hexyldecyl 6-((3-((2-hexyldecyl)oxy)-2-hydroxypropyl)(methyl)amino)hexanoate (H03)

130

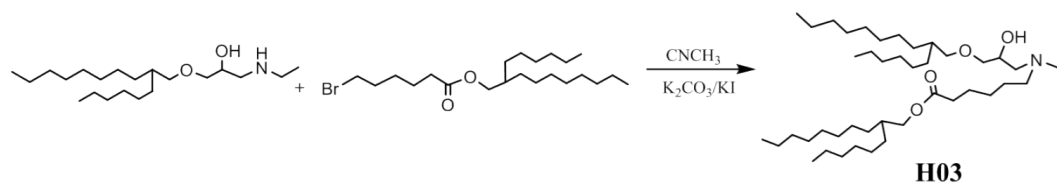

2-Hexyldecyl 6-bromohexanoate (0.836g, 2 mmol),  $K_2CO_3$  (447mg, 6.0 mmol) and KI (48.6 mg, 0.6 mmol), 1-((2-hexyldecyl)oxy)-3-(methylamino)propan-2-ol (0.442 g, 1mmol) were dissolved in  $CNCH_3$  (15 mL). After the mixture solution was stirred at 135 90 °C for 5 hours, the solution was filtered and dried under decompression condition. The obtained residues were redissolved in dichloromethane (50 mL) and washed with brine (2 x 40 mL). The combined organic layer was concentrated to give crude product which was further purified by silica column chromatography (methanol/dichloromethane = 1/20). Compound **H03** was light yellow oil (0.32 g, 3.6 140 mmol, 39.0%) and confirmed by LC-TOF  $[M + H]^+$  668.65, found 668.66 and  $^1H$  NMR.  $^1H$  NMR (600 MHz,  $CDCl_3$ )  $\delta$  3.95 (dd,  $J = 21.8, 6.3$  Hz, 2H), 3.86 (dd,  $J = 9.3, 4.3$  Hz, 1H), 3.45 – 3.25 (m, 4H), 2.57 – 2.26 (m, 9H), 1.52 (ddd,  $J = 53.8, 38.6, 22.4$  Hz, 4H), 1.43 – 1.03 (m, 50H), 0.98 – 0.77 (m, 12H).

145

### 1.4 Synthesis of 2-hexyldecyl 6-((3-((2-hexyldecyl)oxy)-2-hydroxypropyl)(4-hydroxybutyl)amino)hexanoate (H04)

Compound **H04** was synthesized by a two-step reaction as shown in scheme 4.

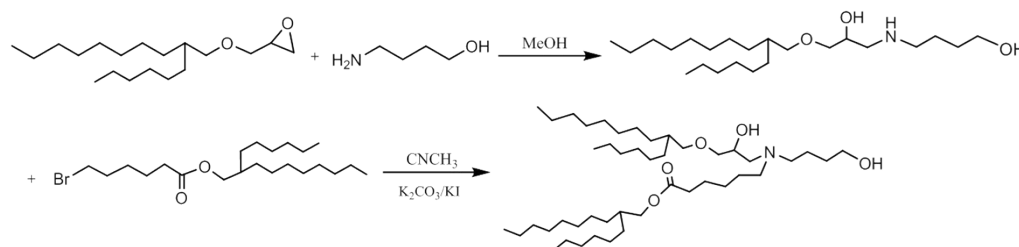

150

#### 1.4.1 Synthesis of 4-((3-((2-hexyldecyl)oxy)-2-hydroxypropyl)amino)butan-1-ol

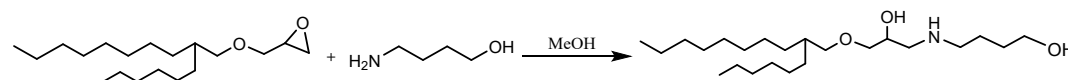

To a flask was added into methanol (15 mL), 4-aminobutan-1-ol (0.60 g, 13.3 mmol) and 2-(((2-hexyldecyl)oxy)methyl)oxirane (1.0 g, 3.34 mmol). The mixture solution was stirred overnight at room temperature. The reaction solution was concentrated and further purified by silica column chromatography (methanol/dichloromethane=1/20). 155

The obtained product was light yellow oil (0.64 g, 12.4 mmol, 55.6%) and confirmed by LC–TOF  $[M + H]^+$  388.37, found 388.37.

160

#### 1.4.2 Synthesis of 2-hexyldecyl 6-((3-((2-hexyldecyl)oxy)-2-hydroxypropyl)(4-hydroxybutyl)amino)hexanoate (H04)

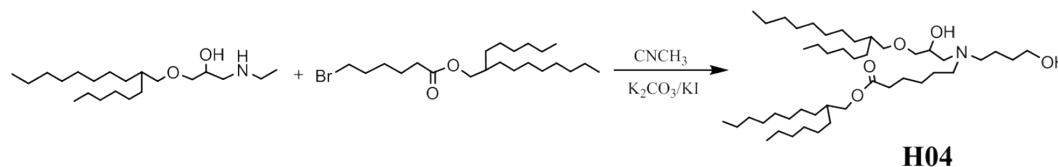

2-Hexyldecyl 6-bromohexanoate (0.836g, 2 mmol),  $K_2CO_3$  (447mg, 6.0 mmol) and KI  
 165 (48.6 mg, 0.6 mmol), 4-((3-((2-hexyldecyl)oxy)-2-hydroxypropyl)amino)butan-1-ol  
 (0.442 g, 1mmol) were dissolved in  $CNCH_3$  (15 mL). After the mixture solution was stirred at 90 °C for 5 hours, the solution was filtered and dried under decompression condition. The obtained residues were redissolved in dichloromethane (50 mL) and washed with brine (2 x 40 mL). The combined organic layer was concentrated to give  
 170 crude product which was further purified by silica column chromatography (methanol/dichloromethane = 1/20). Compound **H04** was light yellow oil (0.32 g, 3.6 mmol, 39.0%) and confirmed by LC–TOF  $[M + H]^+$  726.69, found 726.70 and  $^1H$  NMR.  $^1H$  NMR (600 MHz,  $CDCl_3$ )  $\delta$  3.97 (d,  $J = 5.8$  Hz, 2H), 3.89 (dd,  $J = 8.5, 3.5$  Hz, 1H), 3.67 – 3.54 (m, 2H), 3.43 – 3.26 (m, 4H), 2.63 – 2.36 (m, 6H), 2.31 (t,  $J = 7.5$  Hz, 2H),  
 175 1.63 – 1.52 (m, 6H), 1.56 – 1.05 (m, 53H), 0.88 (t,  $J = 7.0$  Hz, 12H).

#### 1.5 Synthesis of 3-((6-((2-hexylundecyl)oxy)-6-oxohexyl)(methyl)amino)-2-hydroxypropyl 2-hexyldecanoate (H05)

Compound **H05** was synthesized by a two-step reaction as shown in scheme 5.

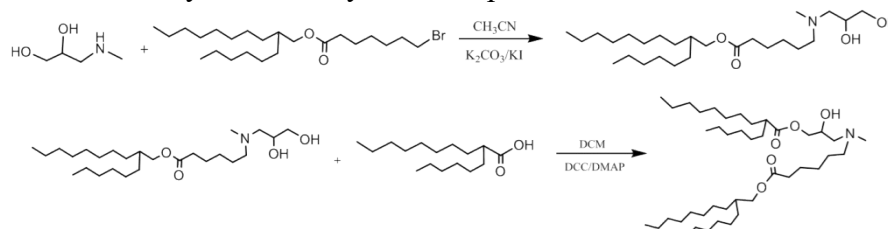

Scheme 5

#### 180 1.5.1 Synthesis of 2-hexyldecyl 6-((2,3-dihydroxypropyl)(methyl)amino)hexanoate

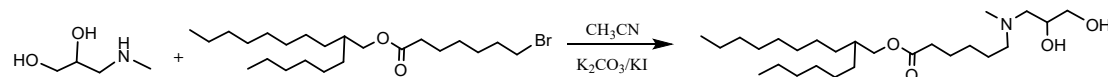

2-Hexyldecyl 6-bromohexanoate (0.836g, 2 mmol),  $K_2CO_3$  (447mg, 6.0 mmol) and KI  
 185 (48.6 mg, 0.6 mmol), (1-(ethylamino)-3-((2-hexyldecyl)oxy)propan-2-ol (0.442 g, 1mmol) were dissolved in  $CNCH_3$  (15 mL). After the mixture solution was stirred at 90 °C for 5 hours, the solution was filtered and dried under decompression condition. The obtained residues were redissolved in dichloromethane (50 mL) and washed with brine (2 x 40 mL). The combined organic layer was concentrated to give crude product which  
 190 was further purified by silica column chromatography (methanol/dichloromethane =

1/20). The product was light yellow oil (0.32 g, 3.6 mmol, 39.0%) and confirmed by LC-TOF[M + H]<sup>+</sup> 444.40, found 444.40.

### 1.5.2 Synthesis of 3-((6-((2-hexyldecyl)oxy)-6-oxohexyl)(methyl)amino)-2-hydroxypropyl 2-hexyldecanoate (H05)

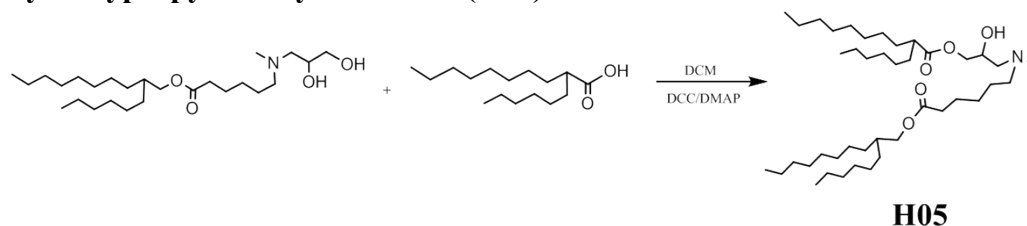

195

DCC (7.50 g, 36.4 mmol) was added to the dichloromethane (DCM) solution containing 2-hexyldecanoic acid (5.76 g, 29.8 mmol) at 25 °C and the solution was stirred for 20 mins at room temperature. Then, 2-hexyldecyl 6-((2,3-dihydroxypropyl)(methyl)amino)hexanoate (6.0 g, 24.8 mmol) and DMAP (170 mg) were added in the above solution overnight at room temperature. The crude product was obtained under reduced pressure and purified by silica column chromatography (methanol/dichloromethane = 1/20). Compound **H05** was obtained as colorless oil. (8.5g, 20.33 mmol, 77.3%yield) and confirmed by LC-TOF [M + H]<sup>+</sup> 682.63, found 682.63 and <sup>1</sup>H NMR. <sup>1</sup>H NMR (600 MHz, CDCl<sub>3</sub>) δ 4.19 – 4.02 (m, 2H), 3.97 (d, *J* = 5.8 Hz, 2H), 3.74 (ddd, *J* = 21.1, 12.5, 6.8 Hz, 1H), 2.66 – 2.15 (m, 9H), 1.61 – 1.09 (m, 54H), 0.88 (qd, *J* = 6.6, 3.1 Hz, 12H).

210

215

220

## 2. Mass spectra of five ionizable lipids

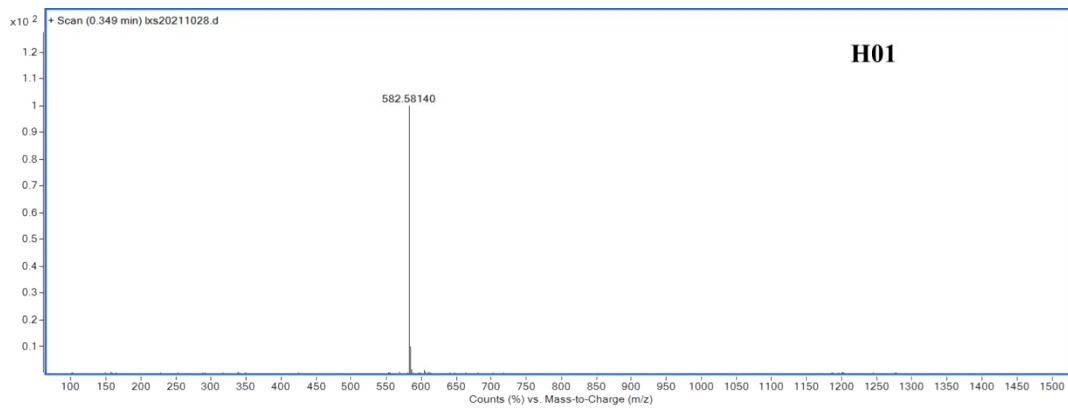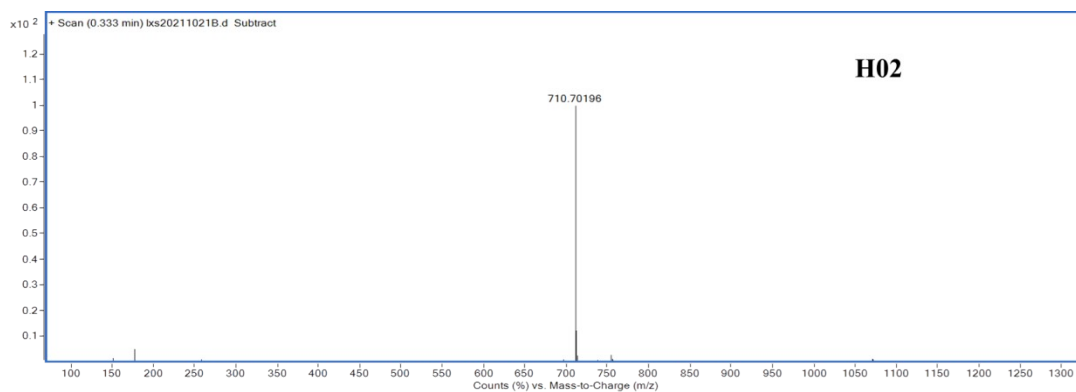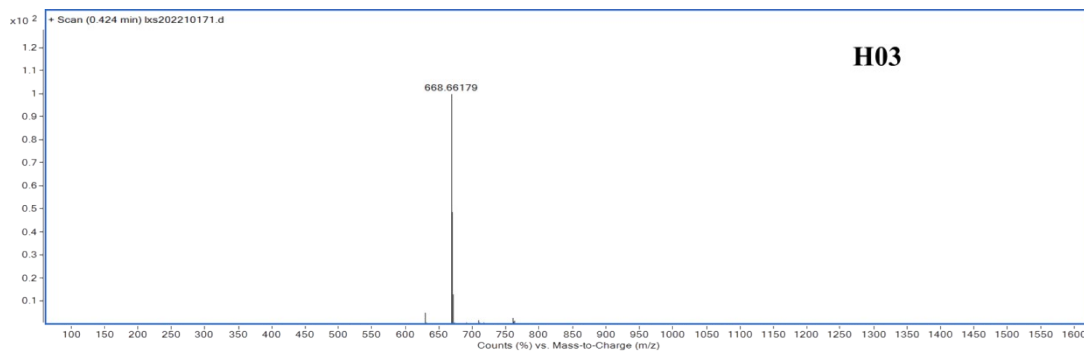

225

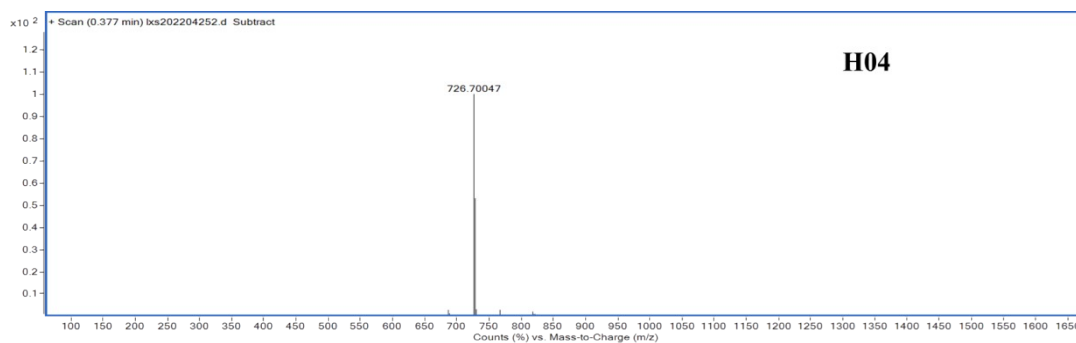



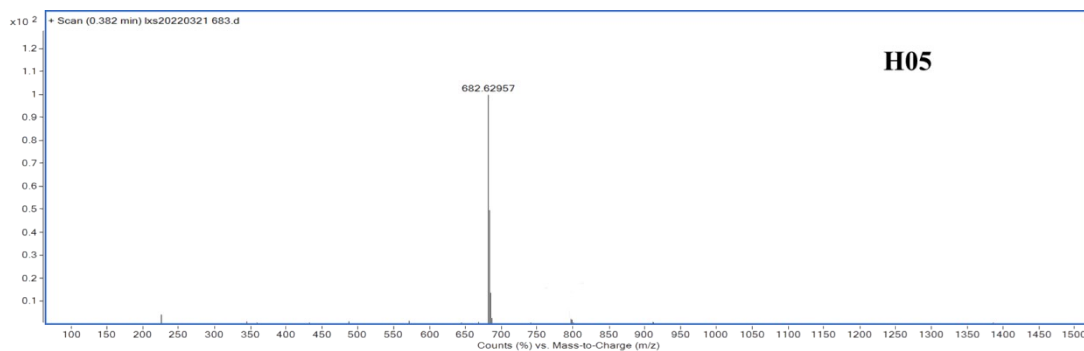

**Figure S1**

230

235

240

245

250

255

260

### 3. <sup>1</sup>H NMR spectra of five ionizable lipids

265

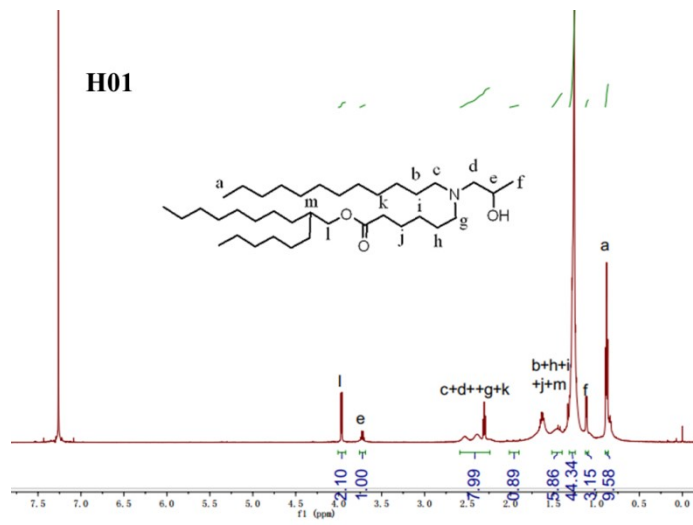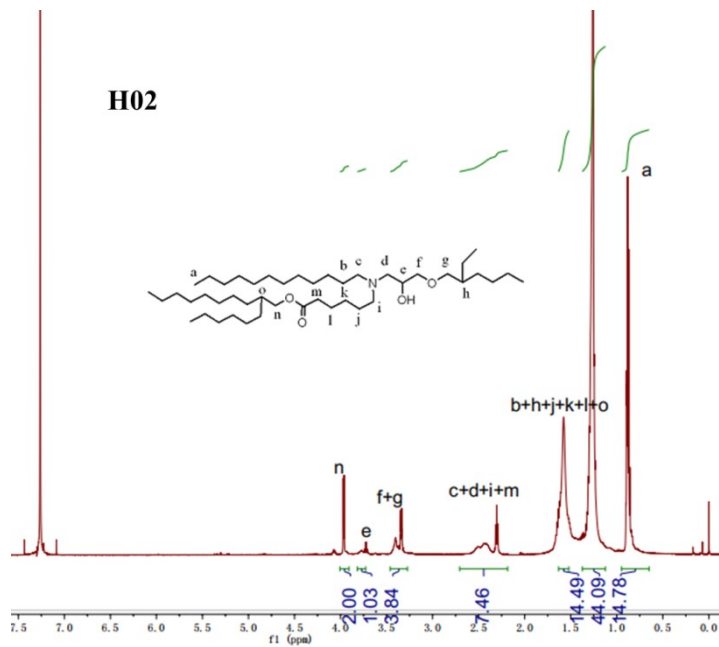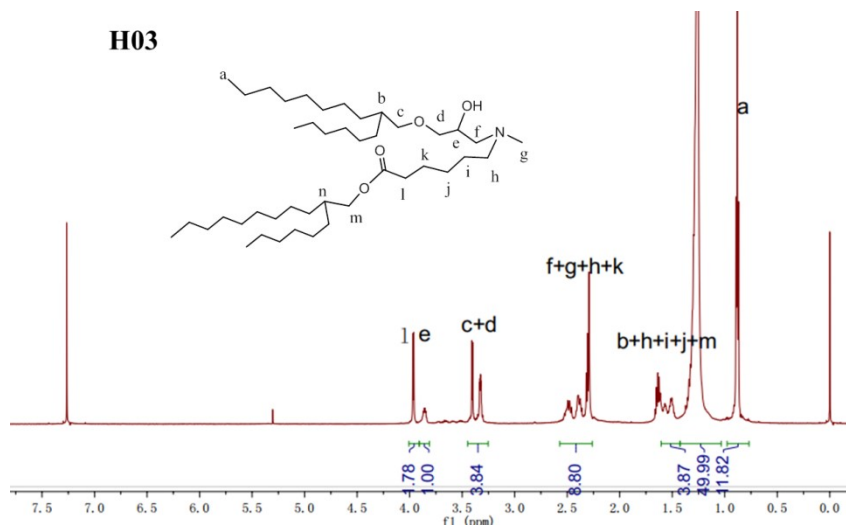

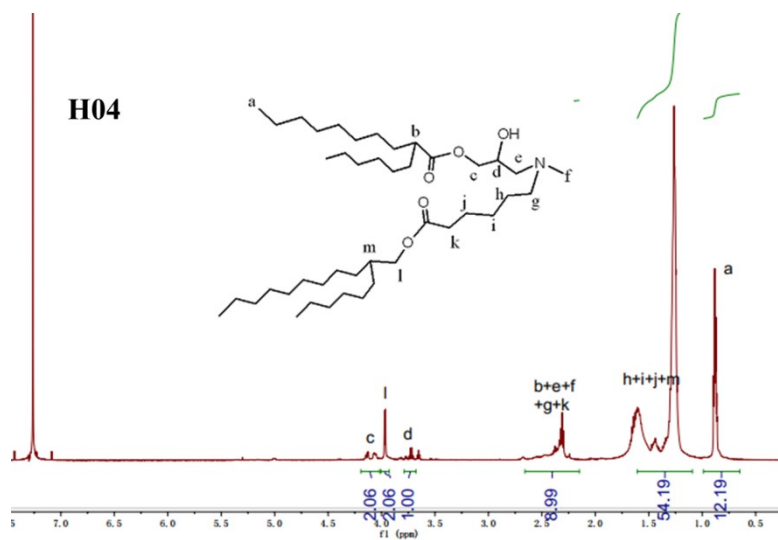

270

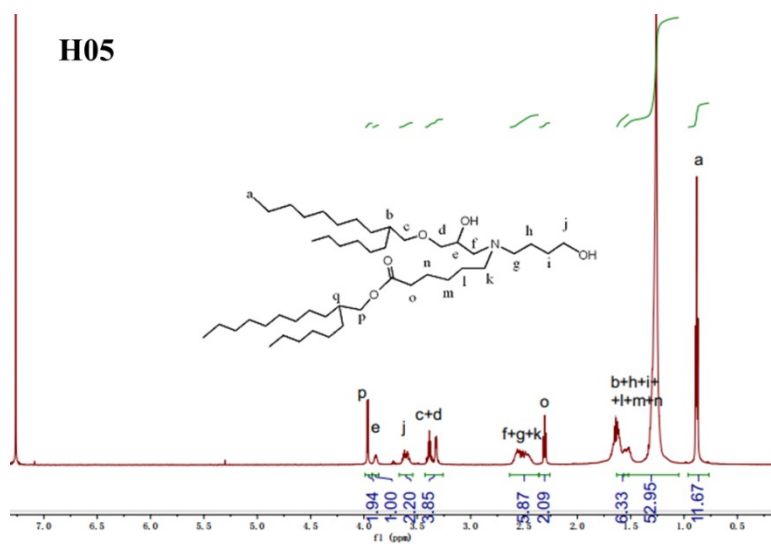

**Figure S2**

275

280

285

#### 4. Percentages of eGFP positive HEK293T cells measured by flow cytometry

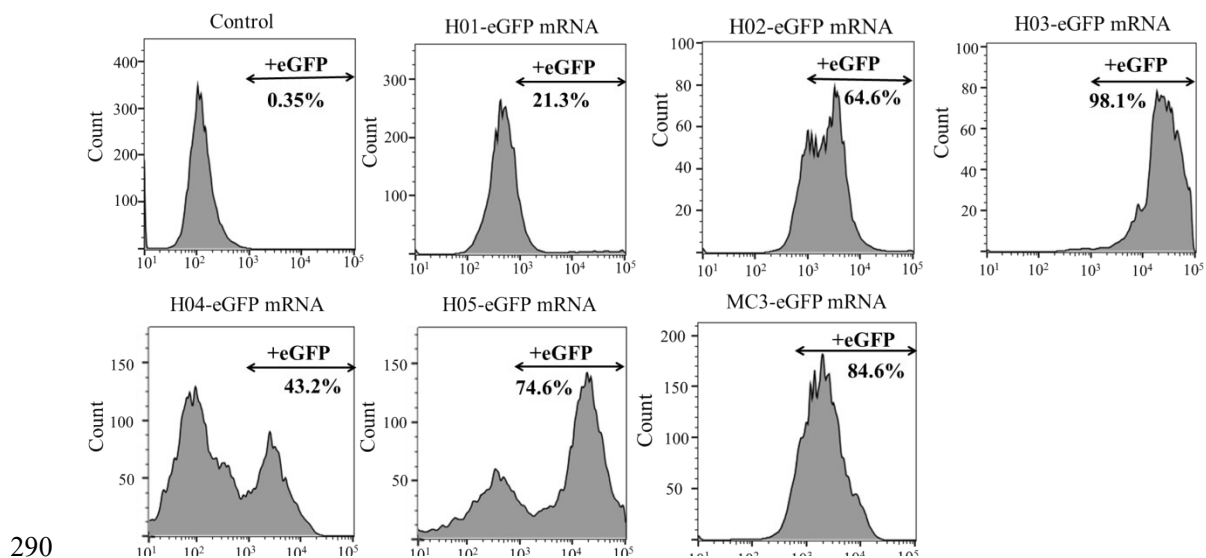

Figure S3

#### 5. Images of lysosomal escape assay *in vitro* of H01, H02, H04 and H05-mRNA

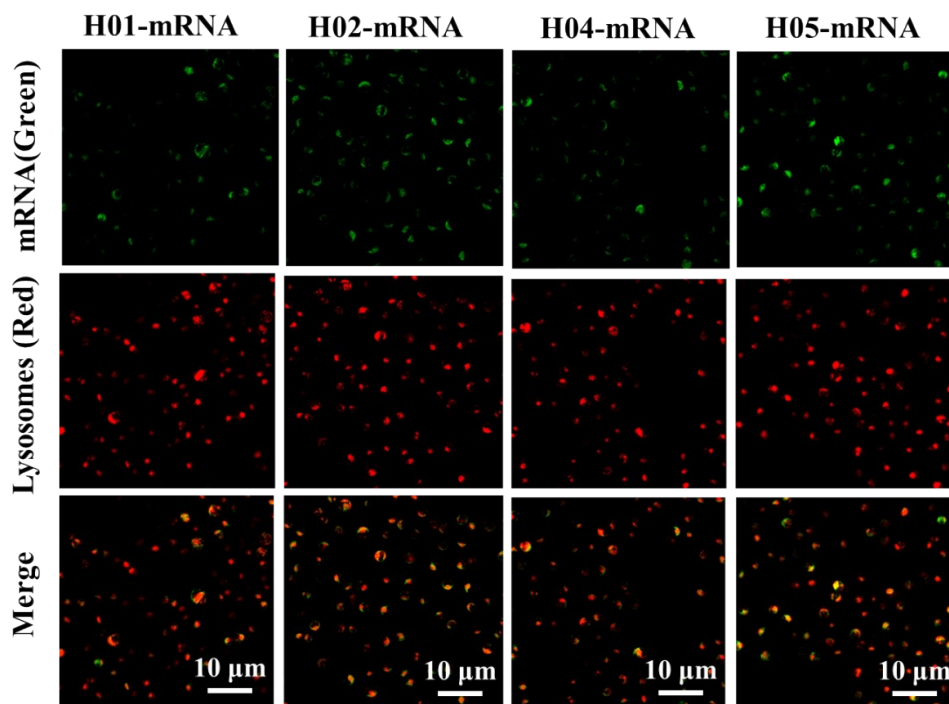

Figure S4

295

300

**6. SARS-CoV-2 (B.1.617.2) RBD-specific CD4+ (a) and CD8+ (b) Tem cells in splenocytes were detected by flow cytometry**

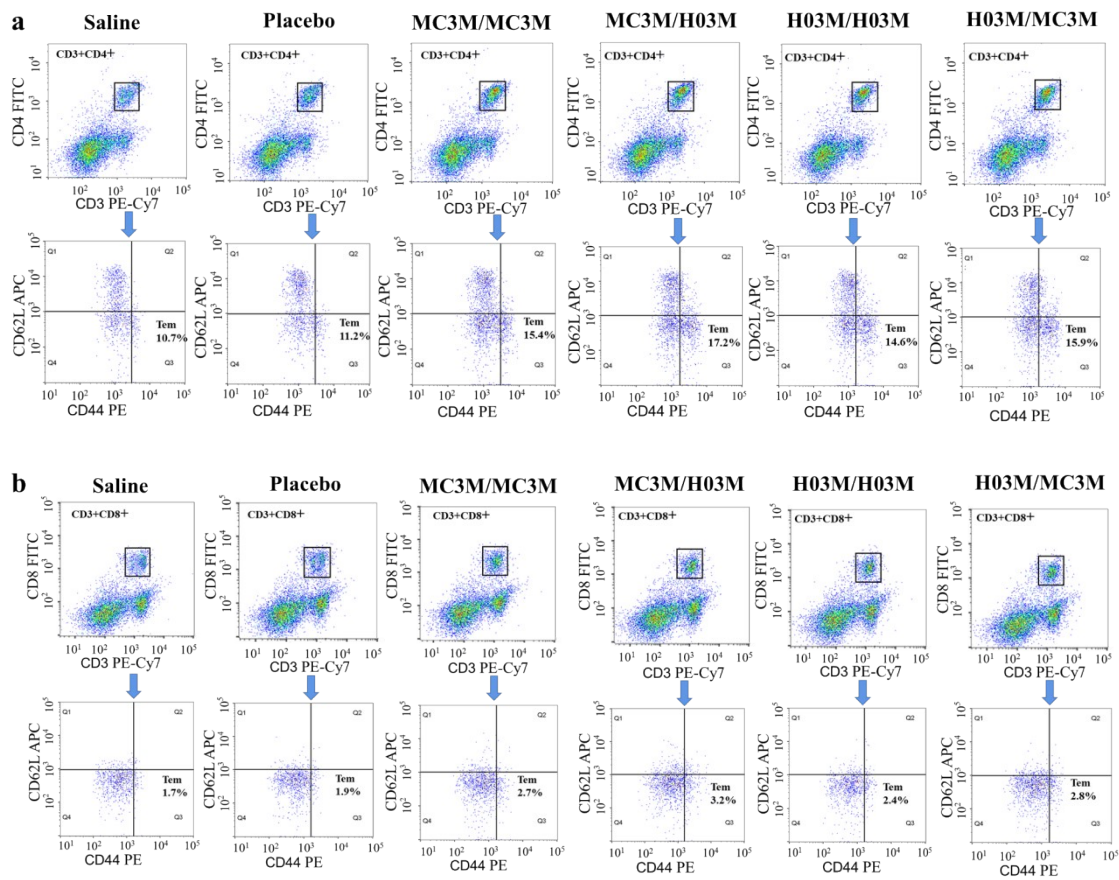

305

**Figure S5**

310

315

## 7. Storage stability of H03-Fluc mRNA and MC3-Fluc mRNA formulations stored

320 at 25 °C, 4 °C and -20 °C

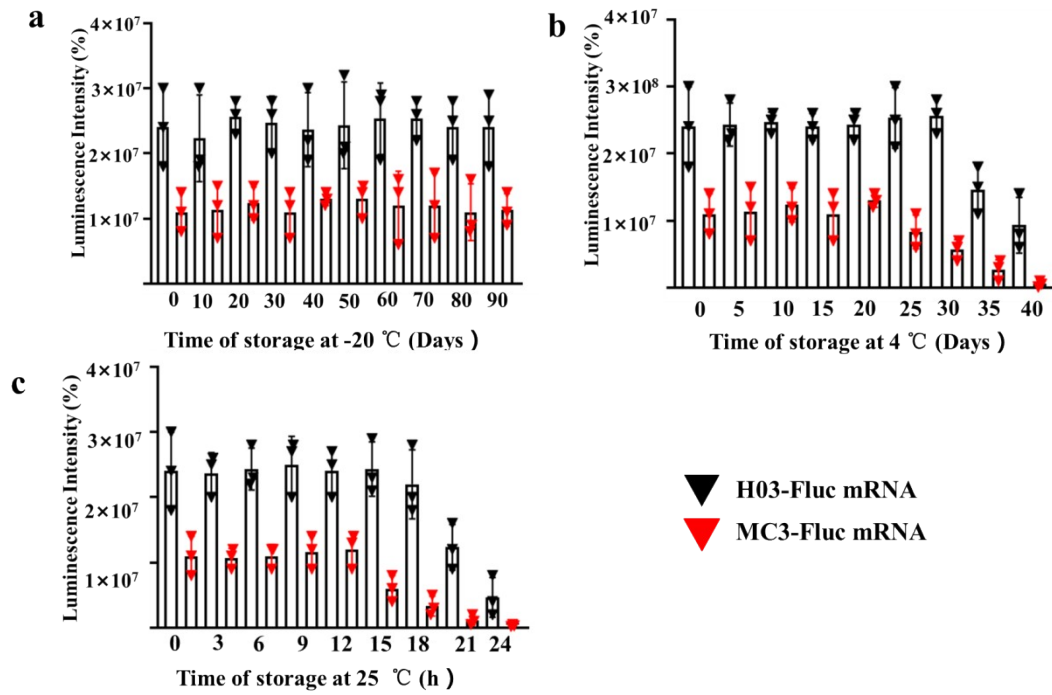

Figure S6

325

330

**8. Amino acid sequence alignment of the SARS-CoV-2(B.1.617.2) RBD**

Delta (B.1.617.2) RBD<sub>Δ</sub>

RVQPTEsIVRFPNITNLCPFGEVFNATRFASVYAWNRKRISNCVADYSVLYNSA  
 SFSTFKCYGVSPTKLNDLCFTNVYADSFVIRGDEV RQIAPGQTGKIADYNYKL  
 PDDFTGCVIAWNSNNLDSKVGGNYNRYRLFRKSNLKPFERDISTEIQAGSK  
 PCNGVEGFNCYFPLQSYGFQPTNGVGYQP YRVVLSFELLHAPATVCGPKKS  
 TNLVKNKCVNF<sub>Δ</sub>

335 Highlights represent amino acid mutation sites<sub>Δ</sub>

**Figure S7**

**9. The peptide pools of the RBD antigen**

| Serial No. | Sequence           | Length (amino acid) |
|------------|--------------------|---------------------|
| 1          | RVQPTEsIVRFPNITNL  | 17                  |
| 2          | VFNATRFASVYAWNRKRI | 18                  |
| 3          | SVYAWNRKRISNCVADY  | 17                  |
| 4          | KCYGVSPTKLNDLCFTNV | 18                  |
| 5          | KLNDLCFTNVYADSFVIR | 18                  |
| 6          | LFRKSNLKPFERDISTEI | 18                  |
| 7          | PFERDISTEIQA       | 13                  |
| 8          | VVLSFELLHAPATVCGPK | 18                  |
| 9          | HAPATVCGPKKSTNLVK  | 17                  |

340 **Figure S8**

345

350

10. Raw western bot data for Fig.3h

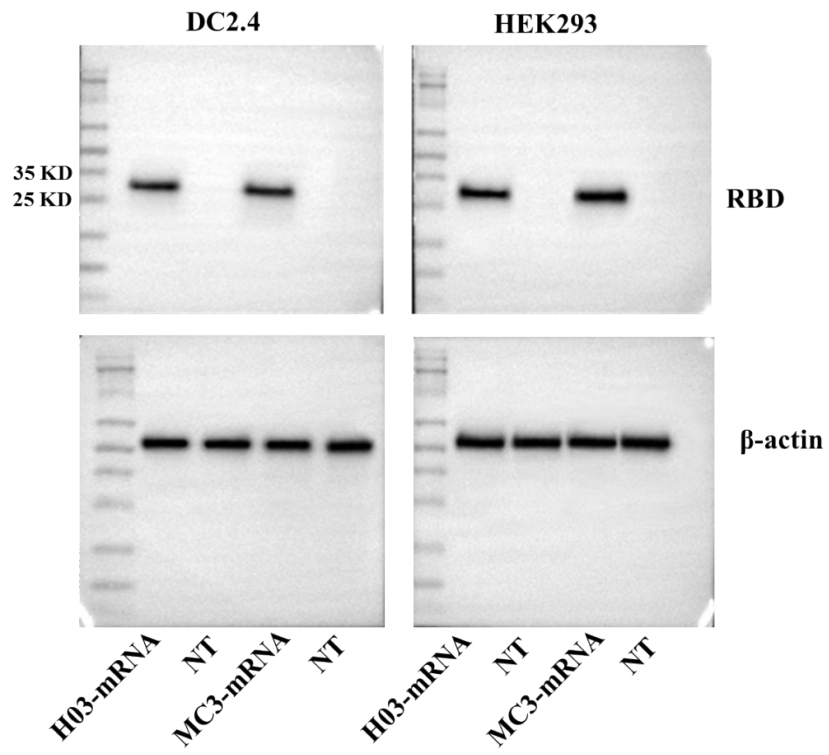

Figure S9
